# Supplementary material
Source: PubMed Central journal article supplement (PMC3259903)

## FIGURE LEGENDS (SUPPLEMENTARY DATA)

### **Figure 1. 4-AP/bic treatment does not precondition against NMDA or glutamate toxicity.**

Cortical neuron cultures were subjected to 'low' 4-AP/bic preconditioning (light bars) or control wash (dark bars), followed by exposure to an excitotoxin 24 h later, with assessment of the % PI-uptake accomplished 24 h later. Excitotoxins employed were (A) 25  $\mu$ M glutamate for 15-20 min; or (B) 30  $\mu$ M NMDA for 15-20 min. Preconditioning did not result in a significant suppression of the % PI-uptake, as assessed using a Student's t-test ( $P > 0.05$ ).

### **Figure 2. 4-AP/bic treatment preconditions against delayed, but not acute, staurosporine toxicity.**

Cultures were subjected to bicuculline (bic; 50  $\mu$ M), 'high' (2.5 mM 4-AP + bic) or 'low' (50  $\mu$ M 4-AP + bic) 4-AP/bic preconditioning (light bars) or control wash (dark bars), with an apoptotic agent, staurosporine (0.75  $\mu$ M for 24 h) treated at different times, followed by measurement of the % PI-uptake. Specific conditions were as follows: (A) Bic, 4-AP/bic or control wash combined with staurosporine for 24 h; (B) Bic, 4-AP/bic or control wash applied for 48 h, with staurosporine present between the 24-48 h time point; (C) Bic, 4-AP/bic or control wash applied for 48 h, followed by exposure to staurosporine for 24 h. Brackets denote a significant difference ( $p < 0.05$ ) between indicated conditions using an ANOVA.

### **Figure 3. Effect of additional receptor antagonists or protein kinase inhibitors on 'low' 4-AP/bic preconditioning-induced OGD tolerance.**

Cortical neuron cultures were subjected to 48 h 'low' 4-AP/bic preconditioning (light bars) or control wash (dark bars) in the absence (labeled antagonist-free) or presence of a receptor antagonist or protein kinase inhibitor, followed by exposure to 65-80 min OGD 24 h later, and then measurement of the %-PI uptake measured 24 h later. Antagonists examined were an NMDA receptor antagonist, MK-801 (1  $\mu$ M;  $n = 12$ ); a  $K_{ATP}$  channel inhibitor, glybenclamide (20  $\mu$ M;  $n = 12-15$ ) or tolbutamide (25  $\mu$ M;  $n = 12$ ); an adenosine  $A_1$  receptor antagonist, 8-cyclopentyltheophylline (8-CPT; 30  $\mu$ M;  $n = 6-12$ ); or inhibitors of PKA, H-89 (5  $\mu$ M;  $n = 12$ ), PKA inhibitory peptide (14-22) (10  $\mu$ M;  $n = 12$ ) or KT 5720 (10  $\mu$ M;  $n = 12$ ). Brackets denote a significant difference ( $p < 0.05$ ) between indicated conditions using an ANOVA.

### **Figure 4. Prolonged elevations of neuronal pCREB levels observed during tolerance-inducing preconditioning.**

(A) Representative immunoblots showing expression of pCREB and CREB from protein samples collected immediately after exposure of cultures to 'high' 4-AP/bic for 20 min, 1 h or 48 h, as well as for protein samples collected from cultures which had been exposed to 4-AP/bic or control wash for 48 h and then washout for 20 min, 1 h or 48 h. (B) Representative immunoblots showing expression of pCREB and CREB from protein samples collected 1 h after exposure of cultures exposed to 'high' 4-AP/bic for 4 h. (C) Representative immunoblots showing expression of pCREB and CREB from protein samples collected immediately after exposure of cultures to 'low' 4-AP/bic for 6 h or 48 h, or from samples collected 4 h or 24 h after 4-AP/bic washout. In all immunoblots, pCREB represents CREB phosphorylated at Ser<sup>133</sup> (upper panel). pCREB gels were stripped and re-probed for CREB (lower panel). Immunoblots are representative of 4 experiments from 4 different platings, with each experiment comprised of 2-3 wells/condition. (D) Same-field immunofluorescence images of cultures labeled with an antibody to MAP-2 or pCREB, following 6 h exposure to 'high' 4-AP/bic. This image is representative of images acquired from 3 different platings, comprised of 3 coverslips/condition with a minimum of 3 images acquired per coverslip.

# Supplementary Fig. 1

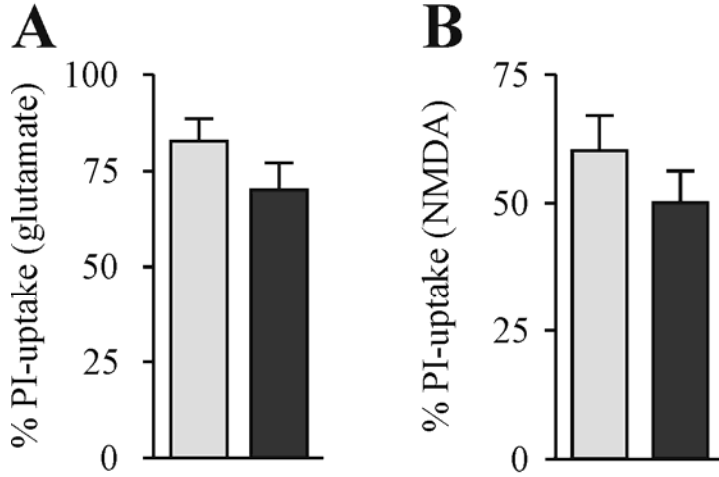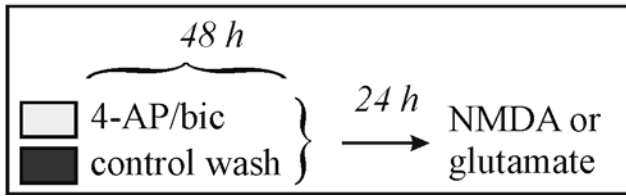

## Supplementary Fig. 2

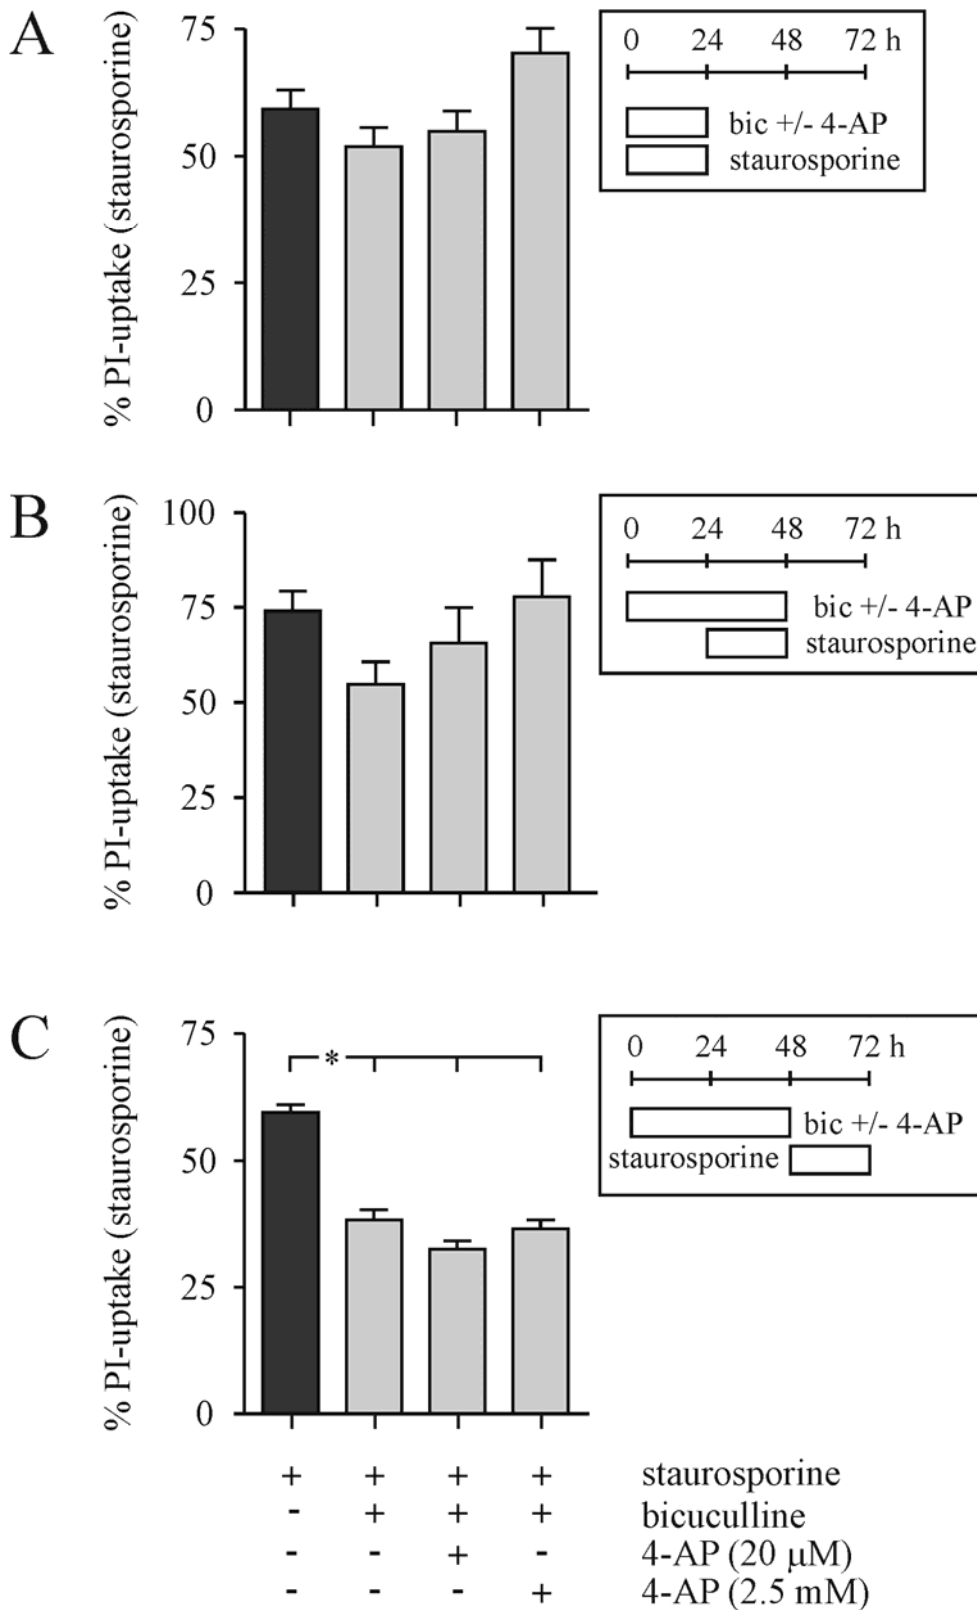

### Supplementary Fig. 3

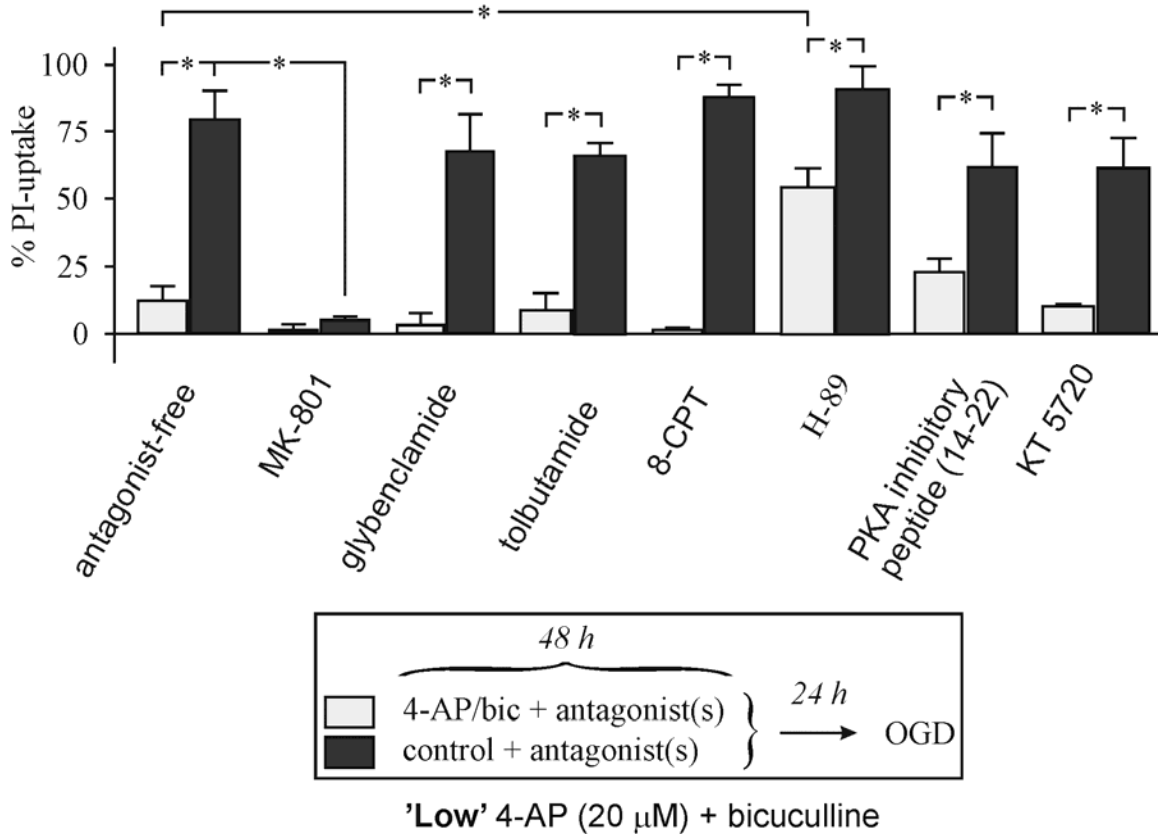

## Supplementary Fig. 4

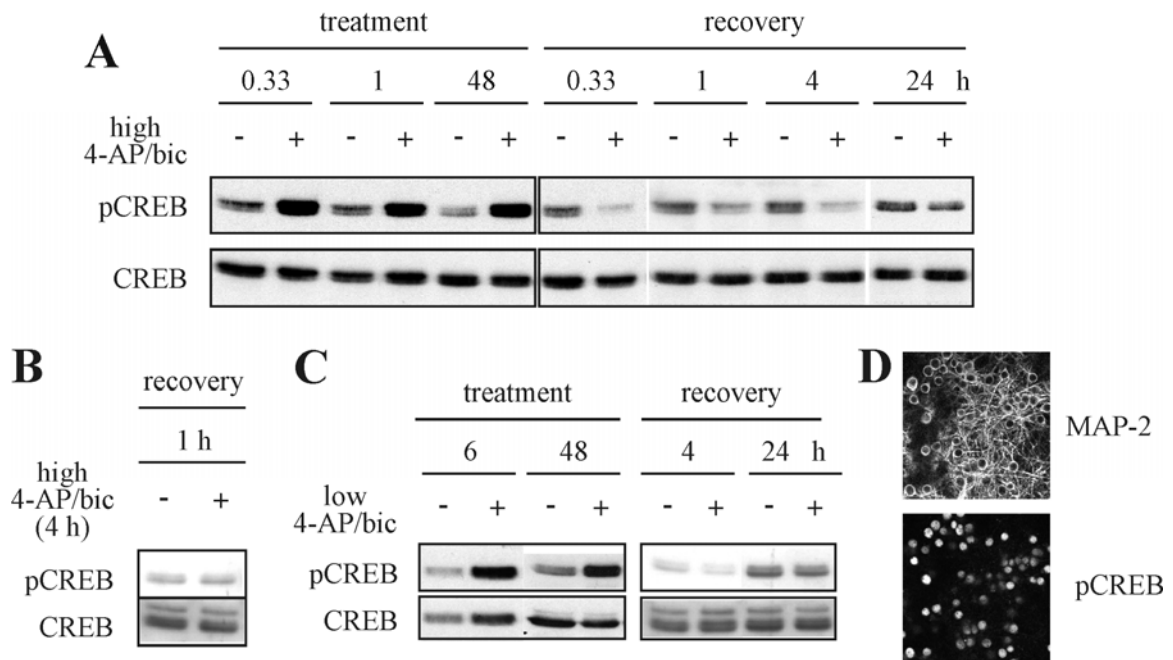

Supplement: M805624200_1.pdf [file M805624200_1.pdf]
